# Supplementary material for: Fabrication of metal–organic salts with heterogeneous conformations of a ligand as dual-functional urease and nitrification inhibitors
Source: Royal Society of Chemistry journal article supplement (doi:10.1039/d3dt01375h), 2023-01-01
Supplement: d3dt01375h1.pdf [file d3dt01375h1.pdf]

## Fabrication of metal-organic salts with heterogeneous conformations of ligand as dual-functional of urease and nitrification inhibitors

Wen-long Duan<sup>a</sup>, Cong Ma<sup>a</sup>, Jian Luan<sup>\*b</sup>, Fang Ding<sup>d</sup>, Feng Yan<sup>a</sup>, Lei Zhang<sup>\*c</sup>, Wen-Ze Li<sup>\*a</sup>

<sup>a</sup> College of Science, Shenyang University of Chemical Technology, Shenyang, 110142, P. R. China

<sup>b</sup> College of Sciences, Northeastern University, Shenyang, 110819, P. R. China

<sup>c</sup> Institute of Applied Ecology, Chinese Academy of Sciences, Shenyang, 110016, P. R. China

<sup>d</sup> College of Tourism and Resources Environment, Zaozhuang University, Zaozhuang, 277160, P. R. China

Emails: [wzli@syuct.edu.cn](mailto:wzli@syuct.edu.cn); [2010044@stu.neu.edu.cn](mailto:2010044@stu.neu.edu.cn); [leizhang@iae.ac.cn](mailto:leizhang@iae.ac.cn)

**Table S1** Crystallographic data for MOSs 1–4.

| MOS                                                   | 1                                                                               | 2                                                                                | 3                                                                               | 4                                                                               |
|-------------------------------------------------------|---------------------------------------------------------------------------------|----------------------------------------------------------------------------------|---------------------------------------------------------------------------------|---------------------------------------------------------------------------------|
| Empirical formula                                     | C <sub>30</sub> H <sub>30</sub> Cl <sub>4</sub> CuF <sub>4</sub> N <sub>2</sub> | C <sub>30</sub> H <sub>30</sub> Cl <sub>4</sub> F <sub>4</sub> N <sub>2</sub> Zn | C <sub>30</sub> H <sub>30</sub> CdCl <sub>4</sub> F <sub>4</sub> N <sub>2</sub> | C <sub>30</sub> H <sub>30</sub> Cl <sub>4</sub> CoF <sub>4</sub> N <sub>2</sub> |
| Formula weight                                        | 699.90                                                                          | 701.73                                                                           | 748.76                                                                          | 695.29                                                                          |
| Temperature (K)                                       | 298                                                                             | 298                                                                              | 298                                                                             | 298                                                                             |
| Crystal size (mm)                                     | 0.14 × 0.13 × 0.10                                                              | 0.14 × 0.12 × 0.10                                                               | 0.14 × 0.12 × 0.09                                                              | 0.14 × 0.12 × 0.10                                                              |
| Crystal system                                        | Triclinic                                                                       | Triclinic                                                                        | Triclinic                                                                       | Triclinic                                                                       |
| Space group                                           | <i>P</i> -1                                                                     | <i>P</i> -1                                                                      | <i>P</i> -1                                                                     | <i>P</i> -1                                                                     |
| <i>Z</i>                                              | 2                                                                               | 2                                                                                | 2                                                                               | 2                                                                               |
| <i>a</i> (Å)                                          | 9.9316(5)                                                                       | 10.0080(5)                                                                       | 9.9952(6)                                                                       | 10.0083(5)                                                                      |
| <i>b</i> (Å)                                          | 12.8000(6)                                                                      | 12.4928(6)                                                                       | 12.5695(8)                                                                      | 12.4895(6)                                                                      |
| <i>c</i> (Å)                                          | 14.2699(7)                                                                      | 14.2889(7)                                                                       | 14.5331(9)                                                                      | 14.2962(7)                                                                      |
| $\alpha$ (deg)                                        | 96.338(2)                                                                       | 93.920(2)                                                                        | 93.582(2)                                                                       | 93.778(2)                                                                       |
| $\beta$ (deg)                                         | 106.813(2)                                                                      | 107.938(2)                                                                       | 108.067(2)                                                                      | 108.137(2)                                                                      |
| $\gamma$ (deg)                                        | 112.103(2)                                                                      | 110.797(2)                                                                       | 111.162(2)                                                                      | 110.772(2)                                                                      |
| <i>V</i> (Å <sup>3</sup> )                            | 1558.96(13)                                                                     | 1556.88(13)                                                                      | 1587.13(17)                                                                     | 1556.27(13)                                                                     |
| <i>D<sub>x</sub></i> (mg cm <sup>-3</sup> )           | 1.491                                                                           | 1.497                                                                            | 1.567                                                                           | 1.484                                                                           |
| $\mu$ (mm <sup>-1</sup> )                             | 1.091                                                                           | 1.179                                                                            | 1.071                                                                           | 0.942                                                                           |
| <i>F</i> (000)                                        | 714                                                                             | 716                                                                              | 752                                                                             | 710                                                                             |
| <i>R</i> <sub>int</sub>                               | 0.0255                                                                          | 0.027                                                                            | 0.028                                                                           | 0.028                                                                           |
| No. of collected data (unique)                        | 28615                                                                           | 26072                                                                            | 18084                                                                           | 39078                                                                           |
| No. of data with [ <i>I</i> ≥ 2σ ( <i>I</i> )]        | 7744                                                                            | 7564                                                                             | 5360                                                                            | 12424                                                                           |
| No. of parameters                                     | 370                                                                             | 358                                                                              | 358                                                                             | 370                                                                             |
| <i>S</i>                                              | 1.022                                                                           | 1.107                                                                            | 1.052                                                                           | 1.055                                                                           |
| <i>R<sub>f</sub></i> / <i>wR<sub>f</sub></i>          | 0.0408/0.1064                                                                   | 0.0521/0.1349                                                                    | 0.0534/0.1320                                                                   | 0.0582/0.1570                                                                   |
| All data <i>R<sub>f</sub></i> / <i>wR<sub>f</sub></i> | 0.0552/0.1173                                                                   | 0.0663/0.1470                                                                    | 0.0586/0.1367                                                                   | 0.0880/0.1807                                                                   |

<sup>a</sup>  $R_1 = \Sigma||F_o| - |F_c|| / \Sigma|F_o|$ , <sup>b</sup>  $wR_2 = \Sigma[w(F_o^2 - F_c^2)^2] / \Sigma[w(F_o^2)^2]^{1/2}$ .

**Table S2** The hydrogen bonds (Å) and angles (°) for MOS 1.

| D–H···A             | D–H (Å) | H···A (Å) | D···A (Å) | D–H···A (°) |
|---------------------|---------|-----------|-----------|-------------|
| N1–H1···C11(i)      | 0.980   | 2.154     | 3.079     | 156.61      |
| N2–H2A···C13(ii)    | 0.980   | 2.232     | 3.165     | 158.62      |
| C23–H23B···C14(iii) | 0.987   | 2.652     | 3.563     | 156.51      |
| C9–H9B···C12(iv)    | 0.971   | 2.719     | 3.676     | 169.00      |
| C8–H8A···C12(v)     | 0.969   | 2.704     | 3.499     | 139.54      |
| C16–H16···C14(vi)   | 0.930   | 2.924     | 3.598     | 130.44      |
| C20–H20···C13(vii)  | 0.930   | 2.774     | 3.682     | 165.58      |
| C13–H13···C13(viii) | 0.931   | 2.708     | 3.571     | 154.54      |

**Table S3** The hydrogen bonds (Å) and angles (°) for MOS 2.

| D–H···A             | D–H (Å) | H···A (Å) | D···A (Å) | D–H···A (°) |
|---------------------|---------|-----------|-----------|-------------|
| N1–H1···C14(i)      | 0.980   | 2.118     | 3.076     | 165.28      |
| N2–H2···C12(ii)     | 0.980   | 2.252     | 3.159     | 152.82      |
| C15–H15A···C13(iii) | 0.970   | 2.775     | 3.601     | 143.53      |
| C16–H16B···C13(iv)  | 0.969   | 2.850     | 3.606     | 135.44      |
| C30–H30B···C11(v)   | 0.968   | 2.823     | 3.725     | 155.28      |
| C1–H1B···C13(vi)    | 0.970   | 2.925     | 3.800     | 150.61      |
| C19–H19···C12(vii)  | 0.930   | 2.879     | 3.758     | 158.14      |
| C8–H8B···C13(viii)  | 0.970   | 2.858     | 3.822     | 172.78      |

**Table S4** The hydrogen bonds (Å) and angles (°) for MOS 3.

| D–H···A             | D–H (Å) | H···A (Å) | D···A (Å) | D–H···A (°) |
|---------------------|---------|-----------|-----------|-------------|
| N1–H1···Cl3(i)      | 0.981   | 2.253     | 3.164     | 154.13      |
| N2–H2···Cl1(ii)     | 0.980   | 2.114     | 3.077     | 167.18      |
| C23–H23A···Cl2(iii) | 0.970   | 2.898     | 3.726     | 143.93      |
| C30–H30B···Cl2(iv)  | 0.970   | 2.784     | 3.648     | 148.80      |
| C11–H11···Cl3(v)    | 0.930   | 2.833     | 3.733     | 163.75      |
| C22–H22A···Cl2(vi)  | 0.970   | 2.884     | 3.851     | 175.30      |
| C15–H15A···Cl2(vii) | 0.970   | 2.905     | 3.787     | 151.72      |
| C1–H1B···Cl4(viii)  | 0.969   | 2.841     | 3.750     | 156.68      |

**Table S5** The hydrogen bonds (Å) and angles (°) for MOS 4.

| D–H···A             | D–H (Å) | H···A (Å) | D···A (Å) | D–H···A (°) |
|---------------------|---------|-----------|-----------|-------------|
| N1–H1···Cl1(i)      | 0.980   | 2.251     | 3.157     | 153.25      |
| N2–H2A···Cl4(ii)    | 0.980   | 2.115     | 3.072     | 165.14      |
| C7–H7A···Cl2(iii)   | 0.970   | 2.932     | 3.803     | 149.91      |
| C9–H9A···Cl2(iv)    | 0.970   | 2.848     | 3.607     | 135.72      |
| C24–H24A···Cl2(v)   | 0.970   | 2.832     | 3.663     | 144.32      |
| C23–H23B···Cl2(vi)  | 0.970   | 2.769     | 3.600     | 144.07      |
| C8–H8A···Cl3(vii)   | 0.970   | 2.825     | 3.729     | 155.36      |
| C12–H12···Cl1(viii) | 0.930   | 2.871     | 3.749     | 158.05      |

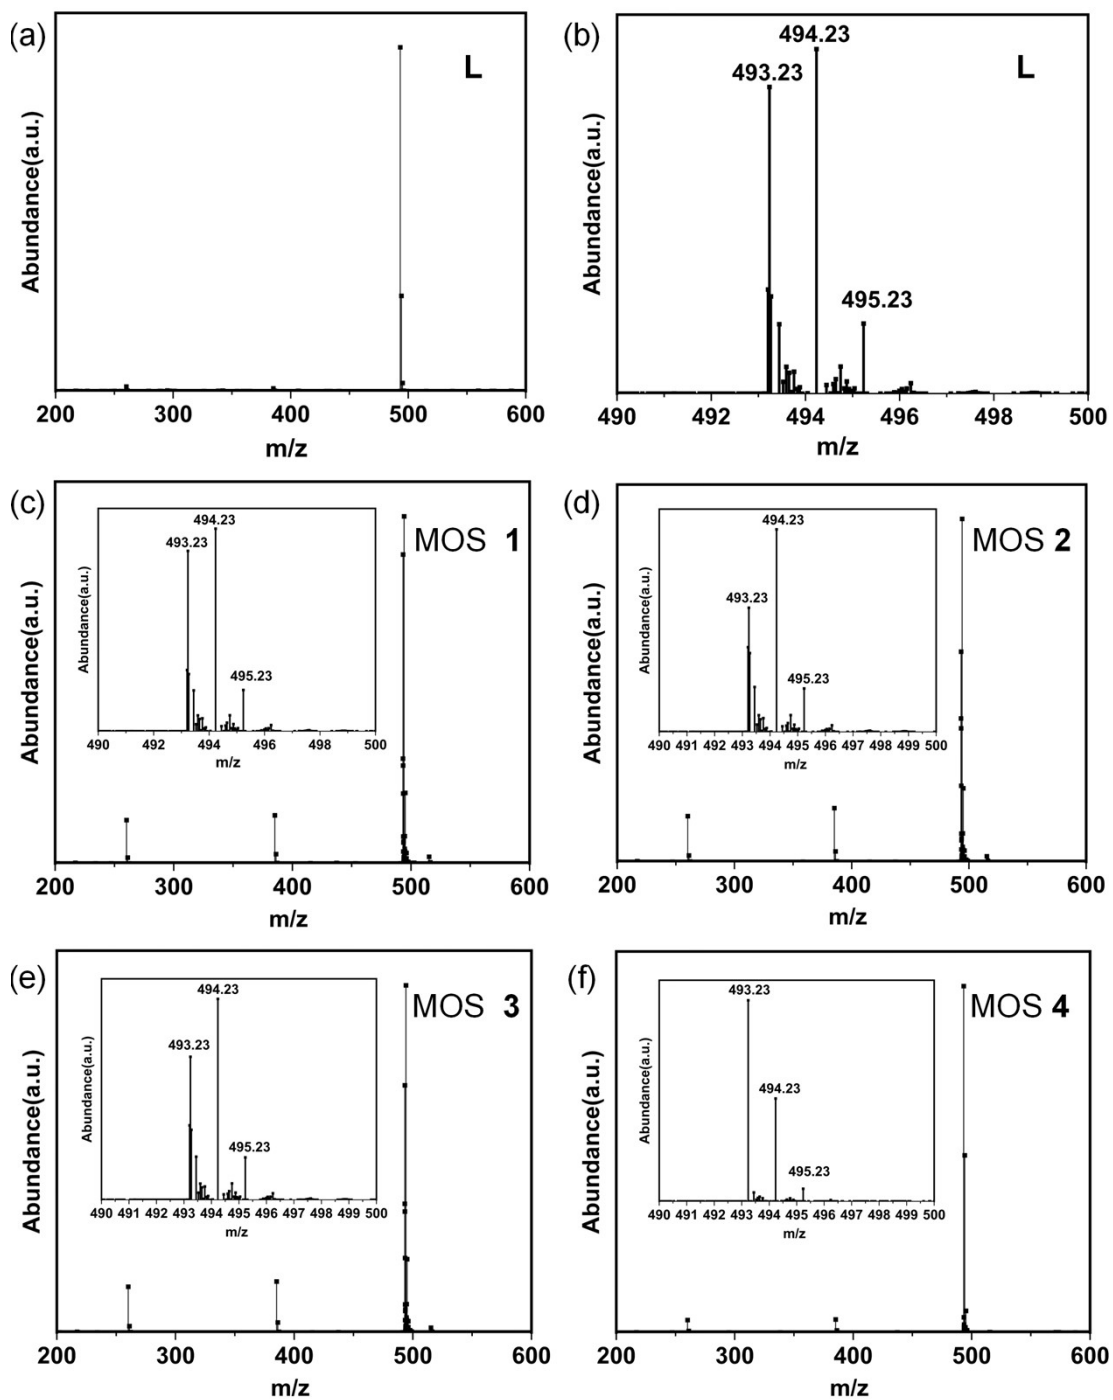

**Fig. S1** The mass spectra of the L (a and b) and MOS 1 (c), 2 (d), 3 (e) and 4 (f).

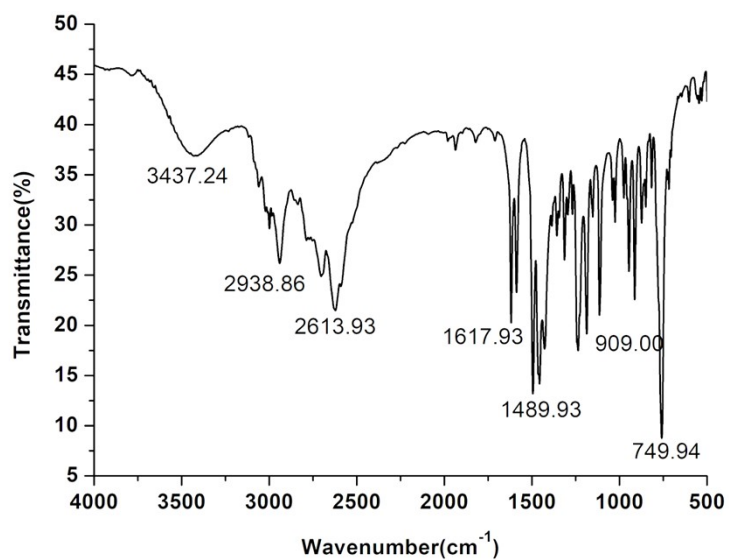

**Fig. S2** IR spectrum of MOS 1.

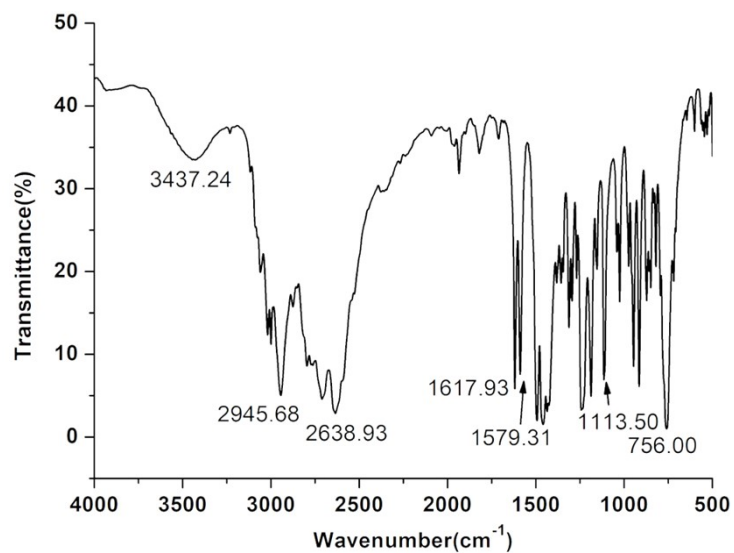

**Fig. S3** IR spectrum of MOS 2.

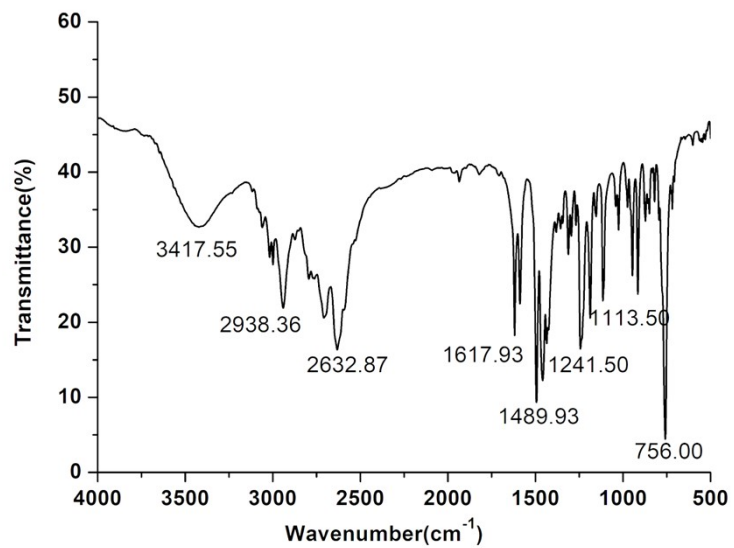

**Fig. S4** IR spectrum of MOS 3

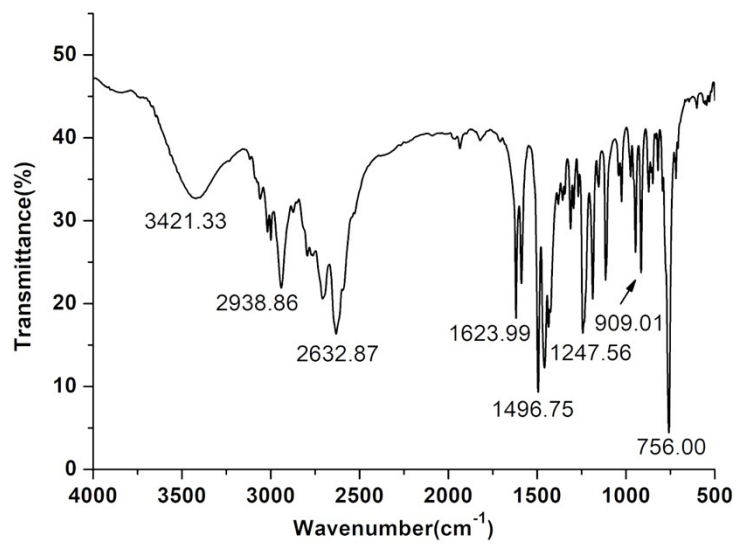

**Fig. S5** IR spectrum of MOS 4.

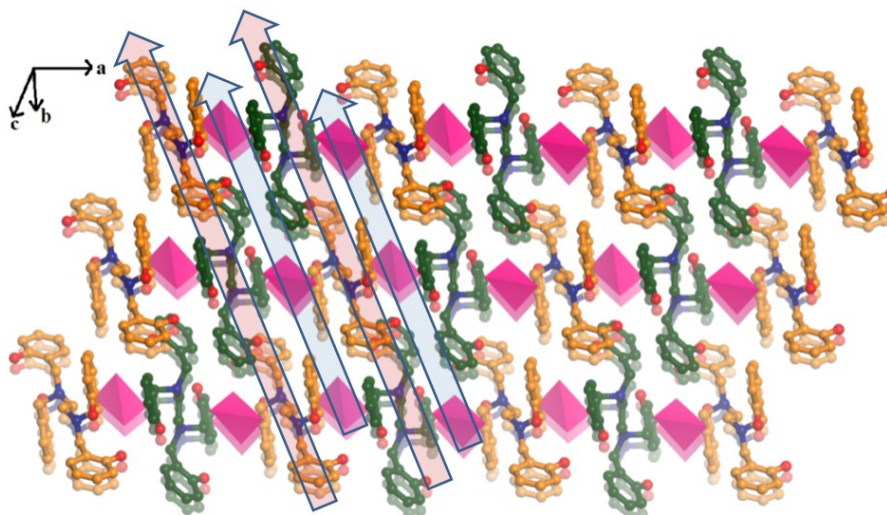

**Fig. S6** 3D packing of MOS 1.

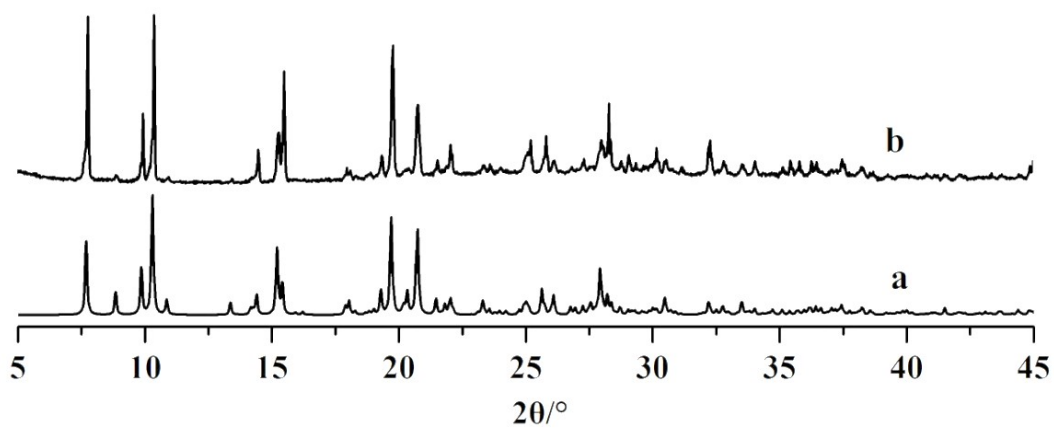

**Fig. S7** Experimental (b) and simulated (a) PXR patterns of MOS 1.

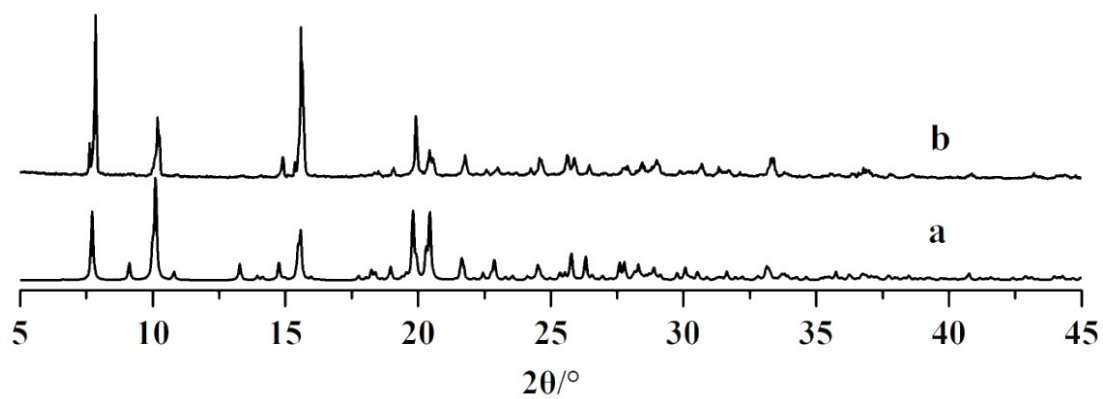

**Fig. S8** Experimental (b) and simulated (a) PXR patterns of MOS 2.

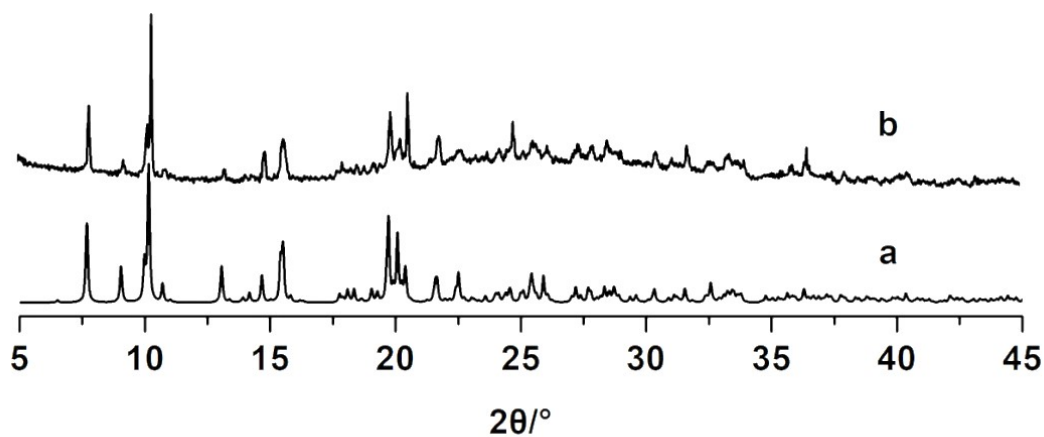

**Fig. S9** Experimental (b) and simulated (a) PXRD patterns of MOS 3.

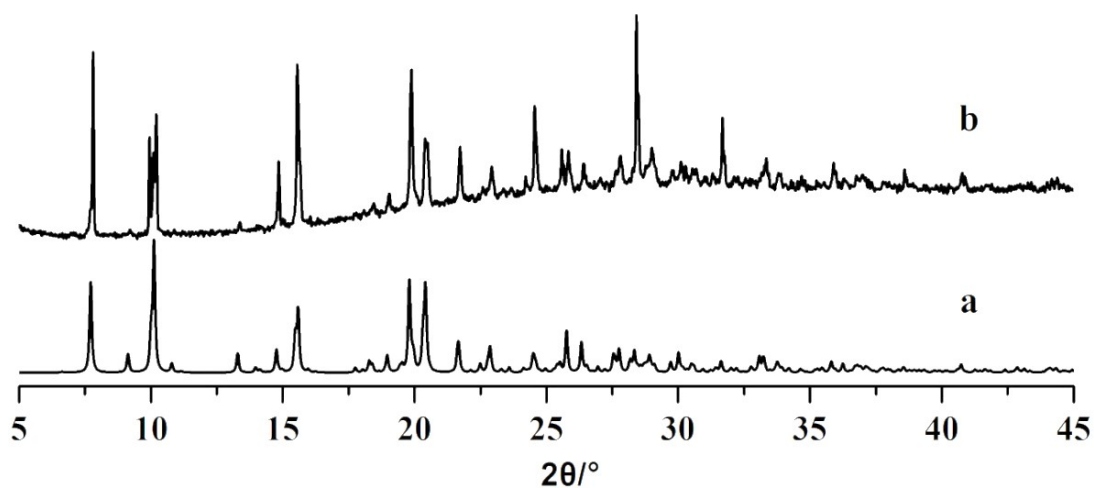

**Fig. S10** Experimental (b) and simulated (a) PXRD patterns of MOS 4.

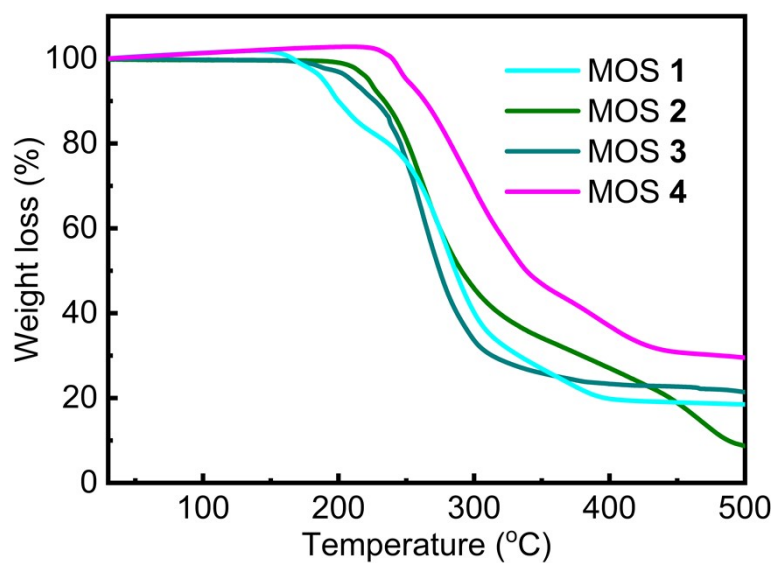

**Fig. S11** TGA curves of MOSs 1–4.



**Table S6** Nitrification inhibitory of the tested materials.

| Material | Day | Nitrification inhibition rate (%) |
|----------|-----|-----------------------------------|
| DCD      | 14  | 68.30%                            |
| L        | 14  | 8.12%                             |
| MOS 1    | 14  | 65.29%                            |
| MOS 2    | 14  | 48.68%                            |
| MOS 3    | 14  | 26.12%                            |
| MOS 4    | 14  | 20.76%                            |
| DCD      | 28  | 73.18%                            |
| L        | 28  | 34.03%                            |
| MOS 1    | 28  | 70.75%                            |
| MOS 2    | 28  | 13.29%                            |
| MOS 3    | 28  | —                                 |
| MOS 4    | 28  | 6.31%                             |
| DCD      | 37  | 74.80%                            |
| L        | 37  | 1.63%                             |
| MOS 1    | 37  | 36.52%                            |
| MOS 2    | 37  | 8.54%                             |
| MOS 3    | 37  | —                                 |
| MOS 4    | 37  | 4.91%                             |
| DCD      | 56  | 61.69%                            |
| L        | 56  | —                                 |
| MOS 1    | 56  | —                                 |
| MOS 2    | 56  | 11.01%                            |
| MOS 3    | 56  | —                                 |
| MOS 4    | 56  | —                                 |
| DCD      | 87  | 14.42%                            |
| L        | 87  | —                                 |
| MOS 1    | 87  | 11.49%                            |
| MOS 2    | 87  | —                                 |
| MOS 3    | 87  | 8.89%                             |
| MOS 4    | 87  | —                                 |
